# Supplementary material for: Later but Not Weaker: Neural Categorization of Native Vowels of Children at Familial Risk of Dyslexia
Source: MDPI journal article supplement (doi:10.3390/brainsci12030412), 2022-03-21
Supplement: s1 [file s1]

## Supplementary materials

Table S1. Time windows (ms after stimulus onset) where the standard and the deviant ERPs differed significantly for the multiple-speaker (MS) and single-speaker (SS) conditions. (+) indicates that the deviant ERP was more positive than the standard ERP, and (-) indicates that the deviant ERP was more negative than the standard ERP, and -- indicates lack of significant difference.

|    |    | F3                         | Fz                                                                 | F4          |
|----|----|----------------------------|--------------------------------------------------------------------|-------------|
| TD | MS | 296–500 (+)<br>576–596 (+) | --                                                                 | 264–288 (+) |
|    | SS | 336–392 (+)                | 572–596 (-)                                                        | --          |
| FR | MS | 204–584 (+)                | 204–252(+)<br>328–360(+)<br>376–404(+)<br>440–476(+)<br>492–504(+) | 296–388 (+) |
|    | SS | 324–364(+)                 | --                                                                 | --          |

Table S2. Mean (SD) amplitude ( $\mu\text{V}$ ) of the standard ERP (STD), the deviant ERP (DEV), and the p-MMR in the multiple-speaker (MS) and single-speaker (SS) condition at corresponding p-MMR peak latencies, separated for the typically developing children (TD) and children at familial risk of dyslexia (FR).

|    |    |       | F3          | Fz           | F4           |
|----|----|-------|-------------|--------------|--------------|
| TD | MS | STD   | 0.87 (1.84) | 0.63 (1.74)  | 2.66 (2.73)  |
|    |    | DEV   | 2.66 (2.73) | 2.09 (2.32)  | 1.46 (2.70)  |
|    |    | p-MMR | 1.78 (2.61) | 1.46 (2.61)  | 0.58 (3.07)  |
|    | SS | STD   | 0.51 (2.36) | –0.07 (1.80) | –0.05 (2.06) |

|    |    |       |             |              |             |
|----|----|-------|-------------|--------------|-------------|
|    |    | DEV   | 2.09 (3.03) | 0.89 (3.69)  | 0.85 (3.62) |
|    |    | p-MMR | 1.58 (3.21) | 0.95 (3.74)  | 0.89 (4.16) |
| FR | MS | STD   | 0.70 (2.22) | 0.19 (2.62)  | 0.47 (2.60) |
|    |    | DEV   | 3.71 (3.59) | 2.10 (4.01)  | 1.98 (3.12) |
|    |    | p-MMR | 3.01 (3.13) | 1.91 (3.34)  | 1.51 (3.24) |
|    | SS | STD   | 0.34 (2.10) | −0.15 (2.25) | 0.15 (2.16) |
|    |    | DEV   | 1.25 (2.64) | 0.89 (2.83)  | 1.05 (3.42) |
|    |    | p-MMR | 0.91 (2.83) | 1.04 (3.21)  | 0.90 (3.75) |
|    |    |       |             |              |             |
|    |    |       |             |              |             |
|    |    |       |             |              |             |
|    |    |       |             |              |             |
